# Supplementary material for: Epigenetic Influences on Associations between Air Pollutants and Lung Function in Elderly Men: The Normative Aging Study
Source: PubMed Central journal article supplement (PMC4050500; doi:10.1289/ehp.1206458), 2014-03-06
Supplement: ehp.1206458.s001.pdf [file ehp.1206458.s001.pdf]

## **Supplemental Material**

### **Epigenetic Influences on Associations between Air Pollutants and Lung Function in Elderly Men: The Normative Aging Study**

Johanna Lepeule, Marie-Abele Catherine Bind, Andrea A. Baccarelli, Petros Koutrakis, Letizia Tarantini, Augusto Litonjua, David Sparrow, Pantel Vokonas, and Joel D. Schwartz

| <b>Table of contents</b>                                                                                                                                                                                                                                                                                                                                                                                                                                                               | <b>Page</b> |
|----------------------------------------------------------------------------------------------------------------------------------------------------------------------------------------------------------------------------------------------------------------------------------------------------------------------------------------------------------------------------------------------------------------------------------------------------------------------------------------|-------------|
| <b>Figure S1.</b> Sensitivity analysis adjusting for potential survival bias using inverse probability weighting: percent difference in forced vital capacity (FVC, black circles) and forced expiratory volume in 1 second (FEV <sub>1</sub> , grey circles) (and 95% confidence intervals (bars)) associated with one interquartile range increase in air pollutant concentration in 776 men participating to the Normative Aging Study, 1999-2009.                                  | <b>3</b>    |
| <b>Figure S2.</b> Percent difference in forced vital capacity (FVC) (in black) and forced expiratory volume in 1 second (FEV <sub>1</sub> ) (in grey) (and 95% confidence intervals (bars)) associated with one interquartile range increase in air pollutant concentration (28-days moving average) according to the methylation level (methylation level < median (circles), methylation level ≥ median (triangles)), the Normative Aging Study, Boston metropolitan area, 1999-2009 | <b>4</b>    |
| <b>Table S1.</b> Localization of gene promoters and regions amplified                                                                                                                                                                                                                                                                                                                                                                                                                  | <b>7</b>    |
| <b>Table S2.</b> Percent difference in forced vital capacity (FVC) and forced expiratory volume in 1 second (FEV <sub>1</sub> ) associated with one interquartile range increase in air pollutant concentration (28-days moving average) according to the presence of chronic lung conditions, in 776 men who underwent 1515 visits, the Normative Aging Study, 1999-2009                                                                                                              | <b>8</b>    |

**Table S3.** Spearman correlation coefficients between CpG sites within the same gene in 776 men who underwent 1515 visits, the Normative Aging Study, Boston metropolitan area, 1999-2009

**9**

**Figure S1.** Sensitivity analysis adjusting for potential survival bias using inverse probability weighting: percent difference in forced vital capacity (FVC, black circles) and forced expiratory volume in 1 second (FEV<sub>1</sub>, grey circles) (and 95% confidence intervals (bars)) associated with one interquartile range increase in air pollutant concentration in 776 men participating to the Normative Aging Study, 1999-2009.

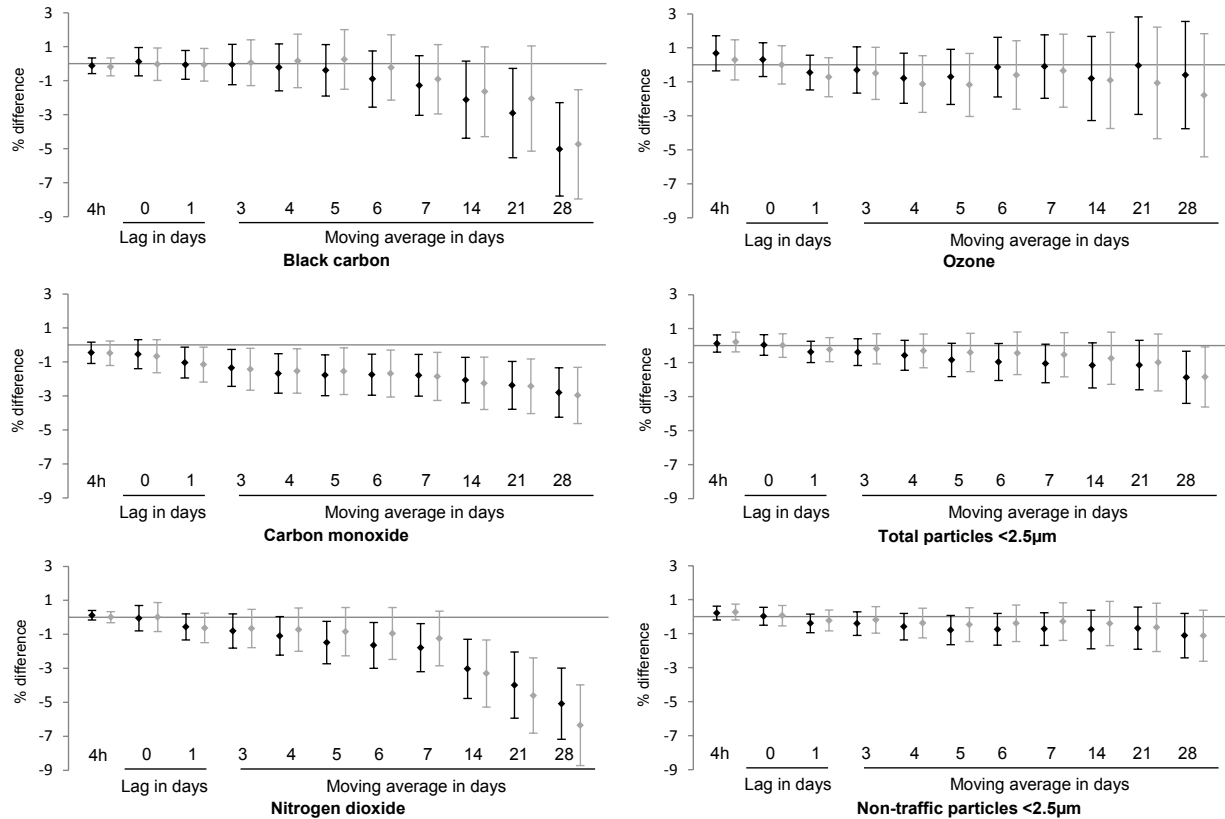

Depending on the pollutant, the number of observations ranged from 1251 to 1271. Results are adjusted for age, race, height, weight, education level, smoking status, cumulative smoking, season of the medical exam, day of the week, visit number, temperature, relative humidity, asthma, chronic bronchitis, emphysema, methacholine responsiveness, corticosteroids, sympathomimetic alpha and beta, anticholinergics. The interquartile range ( $\mu\text{g}/\text{m}^3$ ) was 0.6 for black carbon, 360 for carbon monoxide, 15 for nitrogen dioxide, 33 for ozone, 7 for particles < 2.5  $\mu\text{m}$  and 4 for non-traffic particles < 2.5  $\mu\text{m}$ .

**Figure S2.** Percent difference in forced vital capacity (FVC) (in black) and forced expiratory volume in 1 second (FEV<sub>1</sub>) (in grey) (and 95% confidence intervals (bars)) associated with one interquartile range increase in air pollutant concentration (28-days moving average) according to the methylation level (methylation level < median (circles), methylation level ≥ median (triangles)), the Normative Aging Study, Boston metropolitan area, 1999-2009.

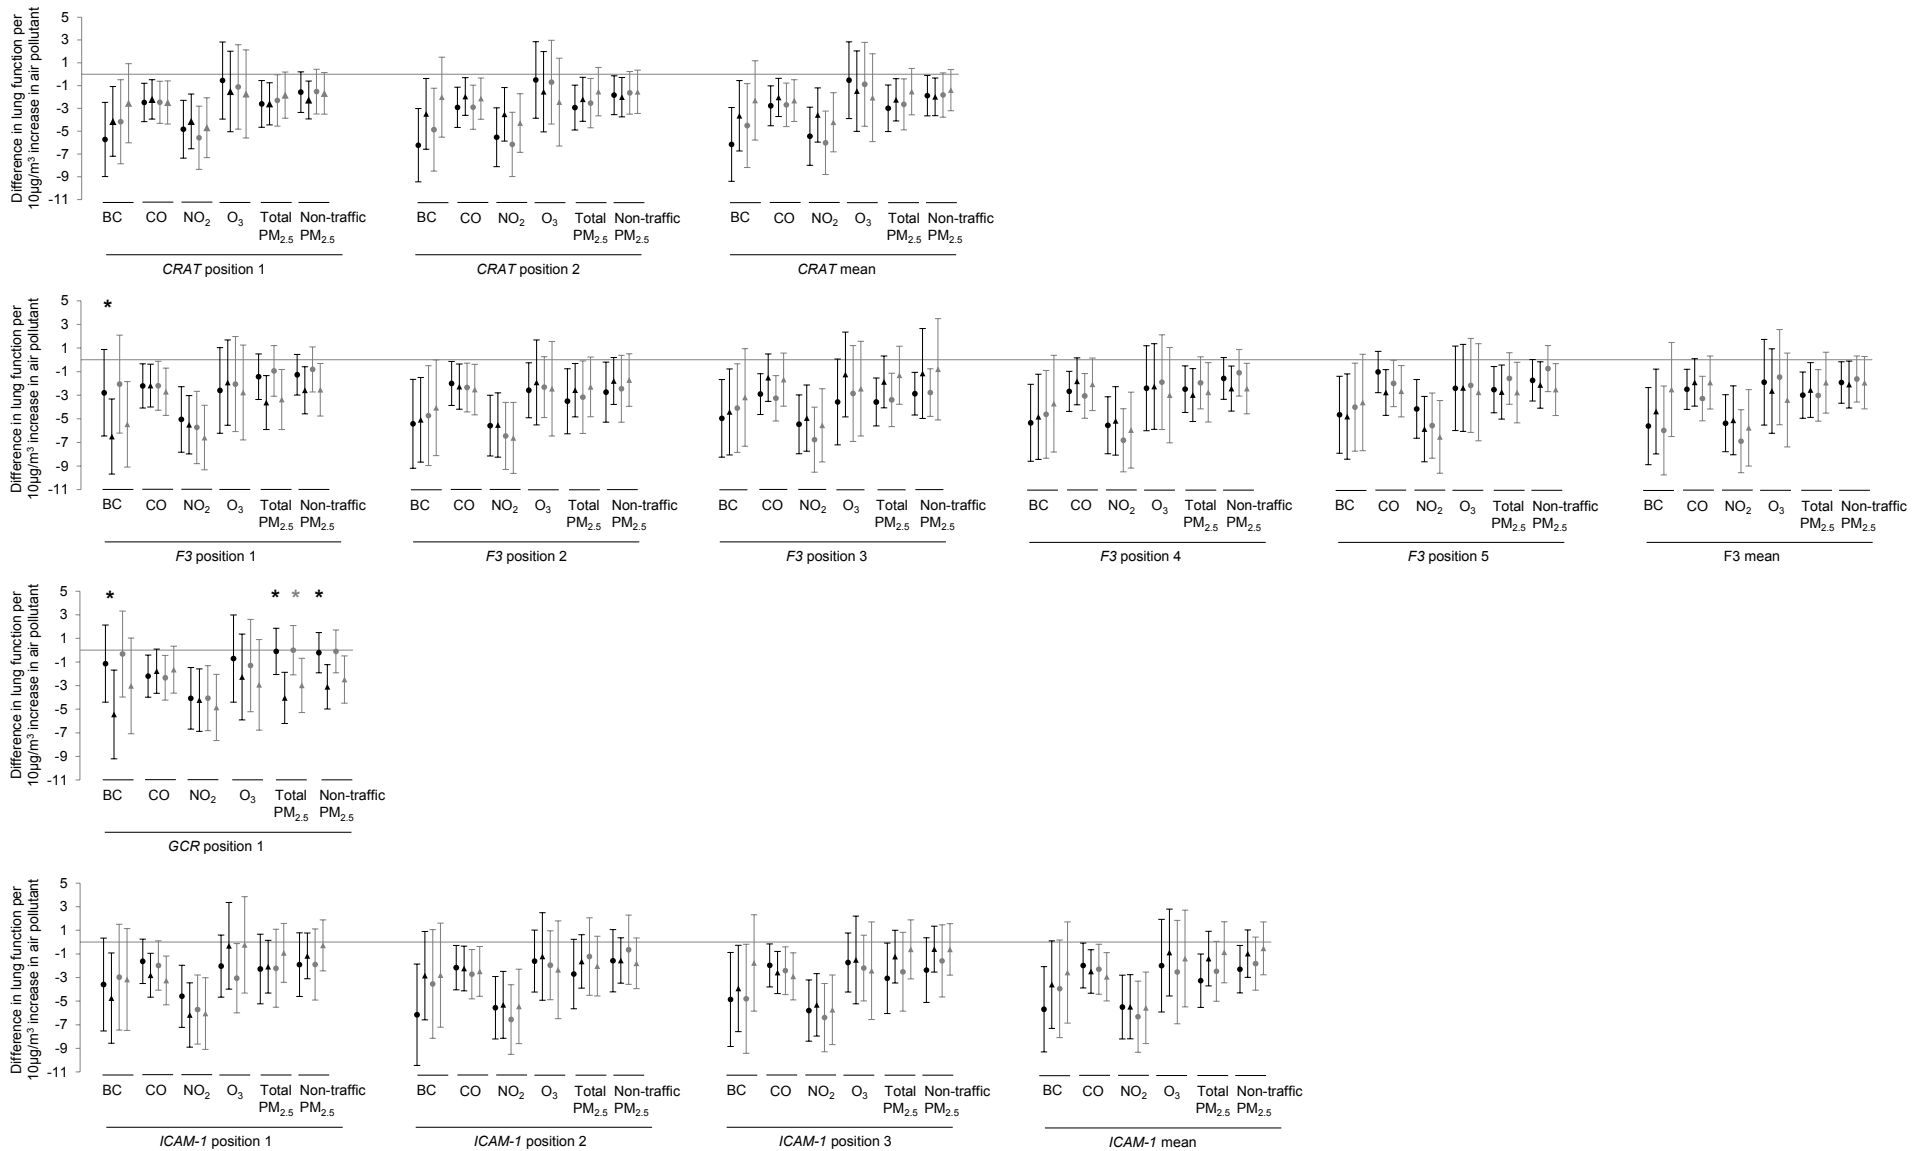

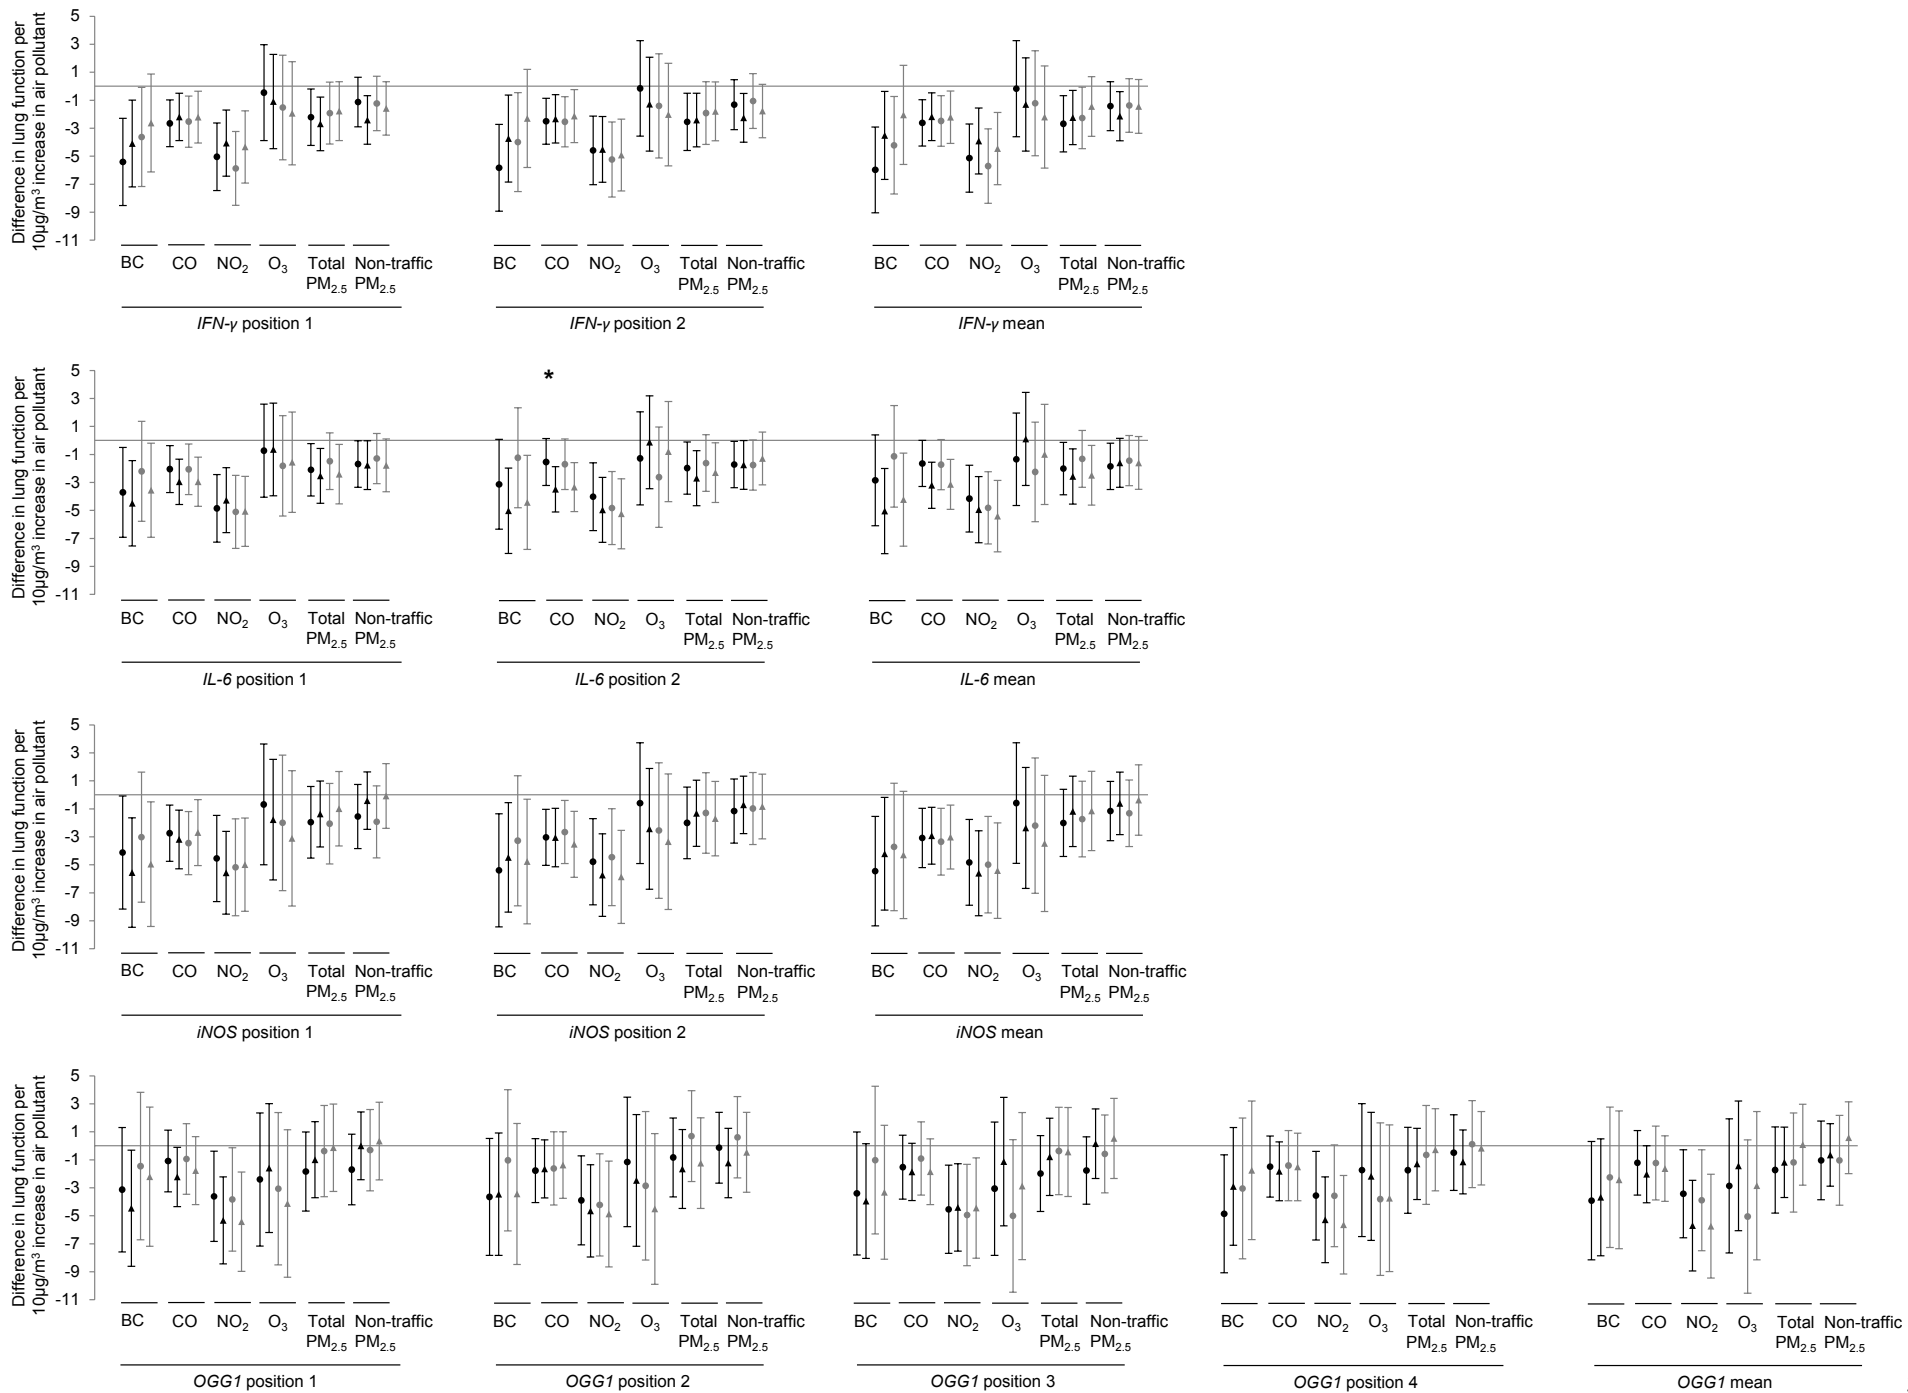

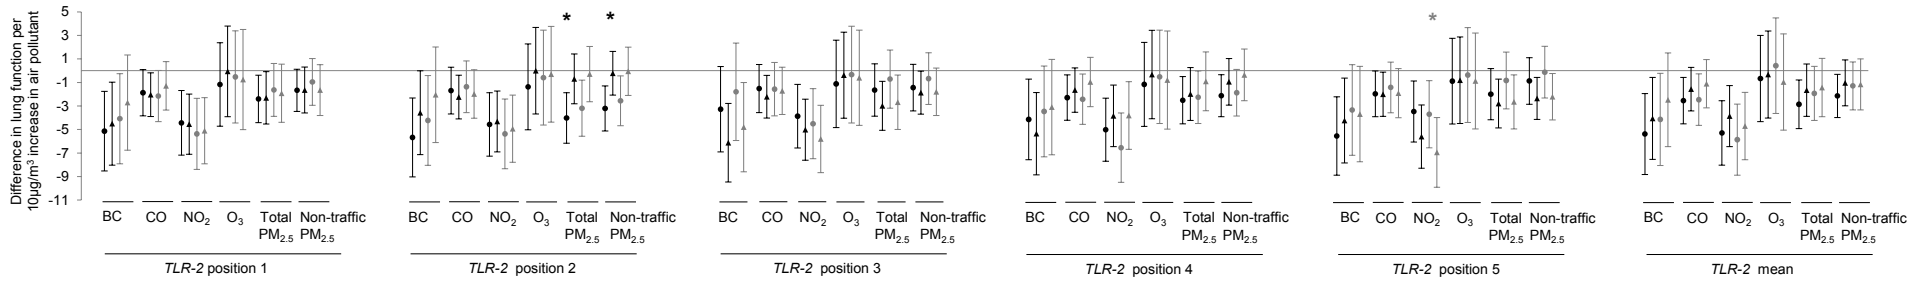

\*Significant interactions ( $p < 0.05$ ).

*CRAT* = Carnitine *O*-acetyltransferase, *F3* =coagulation factor-3, *GCR* =glucocorticoid receptor, ICAM-1, intercellular adhesion molecule, IFN- $\gamma$ , interferon-gamma, *IL-6* =interleukin-6, *iNOS*, inducible nitric oxide synthase, *OGG1*, 8-oxoguanine DNA glycosylase 1, *TLR-2*, toll-like receptor-2. Results were adjusted for age, race, height, weight, education level, smoking status, cumulative smoking, season of the medical exam, day of the week, visit number, temperature, relative humidity, asthma, chronic bronchitis, emphysema, methacholine responsiveness, corticosteroids, sympathomimetic alpha and beta, anticholinergics, and % of white blood cells type. The interquartile range ( $\mu\text{g}/\text{m}^3$ ) was 0.6 for black carbon, 362 for carbon monoxide (CO), 15 for nitrogen dioxide (NO<sub>2</sub>), 33 for ozone (O<sub>3</sub>), 7 for total particles < 2.5  $\mu\text{m}$  (PM<sub>2.5</sub>) and 5 for non-traffic PM<sub>2.5</sub>.

**Table S1.** Localization of gene promoters and regions amplified.

| Gene                           | Chromosome | Promoter<br><i>Start-end</i> | Amplicon<br><i>Start-end</i> | Location          | Promoter | CpGs (position)                                                                                  |
|--------------------------------|------------|------------------------------|------------------------------|-------------------|----------|--------------------------------------------------------------------------------------------------|
| <i>CRAT</i>                    | 9          | 130912702-<br>130913404      | 130912776-<br>130912862      | CpG<br>island     | yes      | 130912824 (pos1)<br>130912806 (pos2)                                                             |
| <i>F3</i>                      | 1          | 94779671-<br>94780502        | 94779878-<br>94780068        | CpG<br>island     | yes      | 94779947 (pos1)<br>94779950 (pos2)<br>94779956 (pos3)<br>94779958 (pos4)<br>94779974 (pos5)      |
| <i>GCR</i>                     | 5          | 142760496-<br>142761097      | 142760531-<br>142760806      | non-CpG<br>island | yes      | 142760565                                                                                        |
| <i>ICAM-1</i>                  | 19         | 10242017-<br>10242937        | 10242034-<br>10242283        | CpG<br>island     | yes      | 10242236 (pos1)<br>10242225 (pos2)<br>10242218 (pos3)                                            |
| <i>IFN-<math>\gamma</math></i> | 12         | 66839561-<br>66840293        | 66840120-<br>66840260        | non-CpG<br>island |          | 66840192 (pos1)<br>66840186 (pos2)                                                               |
| <i>IL-6</i>                    | 7          | 22732791-<br>22733685        | 22733758-<br>22733893        | non-CpG<br>island | no       | 22733847 (pos1)<br>22733841 (pos2)                                                               |
| <i>iNOS</i>                    | 17         | 23149861-<br>23150461        | 23149873-<br>23149990        | non-CpG<br>island | yes      | 23149929 (pos1)<br>23149936 (pos2)                                                               |
| <i>OGGI</i>                    | 3          | 9766128-<br>9766775          | 9766288-<br>9766514          | CpG<br>island     | yes      | 9766356 (pos1)<br>9766366 (pos2)<br>9766373 (pos3)<br>9766380 (pos4)                             |
| <i>TLR-2</i>                   | 4          | 154824391-<br>154824991      | 154824566-<br>154824754      | CpG<br>island     | yes      | 154824709 (pos1)<br>154824713 (pos2)<br>154824715 (pos3)<br>154824723 (pos4)<br>154824727 (pos5) |

**Table S2.** Percent difference in forced vital capacity (FVC) and forced expiratory volume in 1 second (FEV<sub>1</sub>) associated with one interquartile range increase in air pollutant concentration (28-days moving average) according to the presence of chronic lung conditions, in 776 men who underwent 1515 visits, the Normative Aging Study, 1999-2009.

| <b>Pollutant</b>              | <b>Chronic lung condition*</b> | <b>n</b> | <b>FVC: <math>\beta</math> (95%CI)</b> | <b>FVC: p-value interaction<sup>a</sup></b> | <b>FEV<sub>1</sub>: <math>\beta</math> (95%CI)</b> | <b>FEV<sub>1</sub>: p-value interaction<sup>a</sup></b> |
|-------------------------------|--------------------------------|----------|----------------------------------------|---------------------------------------------|----------------------------------------------------|---------------------------------------------------------|
| Black carbon                  | No emphysema                   | 1241     | -4.9 (-7.7, -2.0)                      | 0.006                                       |                                                    |                                                         |
|                               | Emphysema                      | 34       | -17.2 (-24.2, -8.7)                    |                                             |                                                    |                                                         |
| NO <sub>2</sub>               | No emphysema                   | 1241     | -4.4 (-6.4, -2.4)                      | 0.04                                        |                                                    |                                                         |
|                               | Emphysema                      | 34       | -12.9 (-21.1, -4.6)                    |                                             |                                                    |                                                         |
| O <sub>3</sub>                | No emphysema                   | 1241     |                                        |                                             | -1.7 (-5.0, 1.6)                                   | 0.03                                                    |
|                               | Emphysema                      | 34       |                                        |                                             | 7.4 (-1.3, 16.1)                                   |                                                         |
| O <sub>3</sub>                | No chronic bronchitis          | 1204     | -0.4 (-3.4, 2.6)                       | 0.03                                        |                                                    | 0.04                                                    |
|                               | Chronic bronchitis             | 71       | -5.9 (-11.6, -0.2)                     |                                             |                                                    |                                                         |
| PM <sub>2.5</sub>             | No emphysema                   | 1241     | -2.9 (-4.5, -1.3)                      | 0.01                                        |                                                    |                                                         |
|                               | Emphysema                      | 34       | -15.3 (-24.8, -5.6)                    |                                             |                                                    |                                                         |
| PM <sub>2.5</sub>             | No chronic bronchitis          | 1204     |                                        |                                             | -2.0 (-3.8, -0.2)                                  | 0.02                                                    |
|                               | Chronic bronchitis             | 71       |                                        |                                             | -7.4 (-11.8, -3.0)                                 |                                                         |
| PM <sub>2.5</sub> non-traffic | No chronic bronchitis          | 1204     | -1.8 (-3.1, -0.4)                      | 0.04                                        |                                                    | 0.009                                                   |
|                               | Chronic bronchitis             | 71       | -5.7 (-9.4, -2.0)                      |                                             |                                                    |                                                         |

Due to some missing values, the number of observations examined was 1275.

Results were adjusted for age, race, height, weight, education level, smoking status, cumulative smoking, season of the medical exam, day of the week, visit number, temperature, relative humidity, asthma, chronic bronchitis, emphysema, methacholine responsiveness, corticosteroids, sympathomimetic alpha and beta, anticholinergics.

The interquartile range ( $\mu\text{g}/\text{m}^3$ ) was 0.6 for black carbon, 15 for nitrogen dioxide (NO<sub>2</sub>), 33 for ozone (O<sub>3</sub>), 7 for total particles < 2.5  $\mu\text{m}$  (PM<sub>2.5</sub>) and 5 for non-traffic PM<sub>2.5</sub>.

\*Chronic lung conditions considered were emphysema, chronic bronchitis, methacholine responsiveness (as an objective indicator of asthma) and COPD (defined as GOLD stage II (FEV<sub>1</sub>/FVC < 70% and FEV<sub>1</sub> < 80% predicted) or higher). Only results pertaining to significant interactions between pollutants and chronic lung conditions are shown.

<sup>a</sup>Interaction between chronic lung conditions and air pollutant concentration.



**Table S3.** Spearman correlation coefficients between CpG sites within the same gene in 776 men who underwent 1515 visits, the Normative Aging Study, 1999-2009.

|                                | <i>CRAT</i><br>pos1 | <i>CRAT</i><br>pos2 | <i>F3</i><br>pos1 | <i>F3</i><br>pos2 | <i>F3</i><br>pos3 | <i>F3</i><br>pos4 | <i>F3</i><br>pos5 | <i>ICAM-1</i><br>pos1 | <i>ICAM-1</i><br>pos2 | <i>ICAM-1</i><br>pos3 | <i>IFN-<math>\gamma</math></i><br>pos1 | <i>IFN-<math>\gamma</math></i><br>pos2 | <i>IL-6</i><br>pos1 | <i>IL-6</i><br>pos2 | <i>iNOS</i><br>pos1 | <i>iNOS</i><br>pos2 | <i>OGGI</i><br>pos1 | <i>OGGI</i><br>pos2 | <i>OGGI</i><br>pos3 | <i>OGGI</i><br>pos4 | <i>TLR-2</i><br>pos1 | <i>TLR-2</i><br>pos2 | <i>TLR-2</i><br>pos3 | <i>TLR-2</i><br>pos4 | <i>TLR-2</i><br>pos5 |
|--------------------------------|---------------------|---------------------|-------------------|-------------------|-------------------|-------------------|-------------------|-----------------------|-----------------------|-----------------------|----------------------------------------|----------------------------------------|---------------------|---------------------|---------------------|---------------------|---------------------|---------------------|---------------------|---------------------|----------------------|----------------------|----------------------|----------------------|----------------------|
| <i>CRAT</i>                    |                     |                     |                   |                   |                   |                   |                   |                       |                       |                       |                                        |                                        |                     |                     |                     |                     |                     |                     |                     |                     |                      |                      |                      |                      |                      |
| pos1                           | 1.00                |                     |                   |                   |                   |                   |                   |                       |                       |                       |                                        |                                        |                     |                     |                     |                     |                     |                     |                     |                     |                      |                      |                      |                      |                      |
| pos2                           | 0.79                | 1.00                |                   |                   |                   |                   |                   |                       |                       |                       |                                        |                                        |                     |                     |                     |                     |                     |                     |                     |                     |                      |                      |                      |                      |                      |
| mean                           | 0.87                | 0.99                |                   |                   |                   |                   |                   |                       |                       |                       |                                        |                                        |                     |                     |                     |                     |                     |                     |                     |                     |                      |                      |                      |                      |                      |
| <i>F3</i>                      |                     |                     |                   |                   |                   |                   |                   |                       |                       |                       |                                        |                                        |                     |                     |                     |                     |                     |                     |                     |                     |                      |                      |                      |                      |                      |
| pos1                           |                     |                     | 1.00              |                   |                   |                   |                   |                       |                       |                       |                                        |                                        |                     |                     |                     |                     |                     |                     |                     |                     |                      |                      |                      |                      |                      |
| pos2                           |                     |                     | 0.26              | 1.00              |                   |                   |                   |                       |                       |                       |                                        |                                        |                     |                     |                     |                     |                     |                     |                     |                     |                      |                      |                      |                      |                      |
| pos3                           |                     |                     | 0.29              | 0.18              | 1.00              |                   |                   |                       |                       |                       |                                        |                                        |                     |                     |                     |                     |                     |                     |                     |                     |                      |                      |                      |                      |                      |
| pos4                           |                     |                     | 0.29              | 0.32              | 0.44              | 1.00              |                   |                       |                       |                       |                                        |                                        |                     |                     |                     |                     |                     |                     |                     |                     |                      |                      |                      |                      |                      |
| pos5                           |                     |                     | 0.27              | 0.16              | 0.46              | 0.39              | 1.00              |                       |                       |                       |                                        |                                        |                     |                     |                     |                     |                     |                     |                     |                     |                      |                      |                      |                      |                      |
| mean                           |                     |                     | 0.52              | 0.44              | 0.73              | 0.62              | 0.72              |                       |                       |                       |                                        |                                        |                     |                     |                     |                     |                     |                     |                     |                     |                      |                      |                      |                      |                      |
| <i>ICAM-1</i>                  |                     |                     |                   |                   |                   |                   |                   |                       |                       |                       |                                        |                                        |                     |                     |                     |                     |                     |                     |                     |                     |                      |                      |                      |                      |                      |
| pos1                           |                     |                     |                   |                   |                   |                   |                   | 1.00                  |                       |                       |                                        |                                        |                     |                     |                     |                     |                     |                     |                     |                     |                      |                      |                      |                      |                      |
| pos2                           |                     |                     |                   |                   |                   |                   |                   | 0.81                  | 1.00                  |                       |                                        |                                        |                     |                     |                     |                     |                     |                     |                     |                     |                      |                      |                      |                      |                      |
| pos3                           |                     |                     |                   |                   |                   |                   |                   | 0.55                  | 0.51                  | 1.00                  |                                        |                                        |                     |                     |                     |                     |                     |                     |                     |                     |                      |                      |                      |                      |                      |
| mean                           |                     |                     |                   |                   |                   |                   |                   | 0.91                  | 0.87                  | 0.79                  |                                        |                                        |                     |                     |                     |                     |                     |                     |                     |                     |                      |                      |                      |                      |                      |
| <i>IFN-<math>\gamma</math></i> |                     |                     |                   |                   |                   |                   |                   |                       |                       |                       |                                        |                                        |                     |                     |                     |                     |                     |                     |                     |                     |                      |                      |                      |                      |                      |
| pos1                           |                     |                     |                   |                   |                   |                   |                   |                       |                       |                       | 1.00                                   |                                        |                     |                     |                     |                     |                     |                     |                     |                     |                      |                      |                      |                      |                      |
| pos2                           |                     |                     |                   |                   |                   |                   |                   |                       |                       |                       | 0.78                                   | 1.00                                   |                     |                     |                     |                     |                     |                     |                     |                     |                      |                      |                      |                      |                      |
| mean                           |                     |                     |                   |                   |                   |                   |                   |                       |                       |                       | 0.96                                   | 0.92                                   |                     |                     |                     |                     |                     |                     |                     |                     |                      |                      |                      |                      |                      |
| <i>IL-6</i>                    |                     |                     |                   |                   |                   |                   |                   |                       |                       |                       |                                        |                                        |                     |                     |                     |                     |                     |                     |                     |                     |                      |                      |                      |                      |                      |
| pos1                           |                     |                     |                   |                   |                   |                   |                   |                       |                       |                       |                                        |                                        | 1.00                |                     |                     |                     |                     |                     |                     |                     |                      |                      |                      |                      |                      |
| pos2                           |                     |                     |                   |                   |                   |                   |                   |                       |                       |                       |                                        |                                        | 0.79                | 1.00                |                     |                     |                     |                     |                     |                     |                      |                      |                      |                      |                      |
| mean                           |                     |                     |                   |                   |                   |                   |                   |                       |                       |                       |                                        |                                        | 0.95                | 0.94                |                     |                     |                     |                     |                     |                     |                      |                      |                      |                      |                      |
| <i>iNOS</i>                    |                     |                     |                   |                   |                   |                   |                   |                       |                       |                       |                                        |                                        |                     |                     |                     |                     |                     |                     |                     |                     |                      |                      |                      |                      |                      |
| pos1                           |                     |                     |                   |                   |                   |                   |                   |                       |                       |                       |                                        |                                        |                     |                     | 1.00                |                     |                     |                     |                     |                     |                      |                      |                      |                      |                      |
| pos2                           |                     |                     |                   |                   |                   |                   |                   |                       |                       |                       |                                        |                                        |                     |                     | 0.42                | 1.00                |                     |                     |                     |                     |                      |                      |                      |                      |                      |
| mean                           |                     |                     |                   |                   |                   |                   |                   |                       |                       |                       |                                        |                                        |                     |                     | 0.82                | 0.84                |                     |                     |                     |                     |                      |                      |                      |                      |                      |
| <i>OGGI</i>                    |                     |                     |                   |                   |                   |                   |                   |                       |                       |                       |                                        |                                        |                     |                     |                     |                     |                     |                     |                     |                     |                      |                      |                      |                      |                      |
| pos1                           |                     |                     |                   |                   |                   |                   |                   |                       |                       |                       |                                        |                                        |                     |                     |                     |                     | 1.00                |                     |                     |                     |                      |                      |                      |                      |                      |
| pos2                           |                     |                     |                   |                   |                   |                   |                   |                       |                       |                       |                                        |                                        |                     |                     |                     |                     | 0.02                | 1.00                |                     |                     |                      |                      |                      |                      |                      |
| pos3                           |                     |                     |                   |                   |                   |                   |                   |                       |                       |                       |                                        |                                        |                     |                     |                     |                     | -0.03               | 0.02                | 1.00                |                     |                      |                      |                      |                      |                      |
| pos4                           |                     |                     |                   |                   |                   |                   |                   |                       |                       |                       |                                        |                                        |                     |                     |                     |                     | 0.12                | 0.14                | 0.34                | 1.00                |                      |                      |                      |                      |                      |
| mean                           |                     |                     |                   |                   |                   |                   |                   |                       |                       |                       |                                        |                                        |                     |                     |                     |                     | 0.47                | 0.55                | 0.42                | 0.57                |                      |                      |                      |                      |                      |
| <i>TLR-2</i>                   |                     |                     |                   |                   |                   |                   |                   |                       |                       |                       |                                        |                                        |                     |                     |                     |                     |                     |                     |                     |                     |                      |                      |                      |                      |                      |
| pos1                           |                     |                     |                   |                   |                   |                   |                   |                       |                       |                       |                                        |                                        |                     |                     |                     |                     |                     |                     |                     |                     | 1.00                 |                      |                      |                      |                      |
| pos2                           |                     |                     |                   |                   |                   |                   |                   |                       |                       |                       |                                        |                                        |                     |                     |                     |                     |                     |                     |                     |                     | 0.44                 | 1.00                 |                      |                      |                      |
| pos3                           |                     |                     |                   |                   |                   |                   |                   |                       |                       |                       |                                        |                                        |                     |                     |                     |                     |                     |                     |                     |                     | 0.41                 | 0.38                 | 1.00                 |                      |                      |
| pos4                           |                     |                     |                   |                   |                   |                   |                   |                       |                       |                       |                                        |                                        |                     |                     |                     |                     |                     |                     |                     |                     | 0.36                 | 0.31                 | 0.44                 | 1.00                 |                      |
| pos5                           |                     |                     |                   |                   |                   |                   |                   |                       |                       |                       |                                        |                                        |                     |                     |                     |                     |                     |                     |                     |                     | 0.27                 | 0.21                 | 0.35                 | 0.42                 | 1.00                 |
| mean                           |                     |                     |                   |                   |                   |                   |                   |                       |                       |                       |                                        |                                        |                     |                     |                     |                     |                     |                     |                     |                     | 0.68                 | 0.64                 | 0.72                 | 0.72                 | 0.61                 |

Pos = CpG site (see Table S1).

Depending on the gene and position, the sample size ranged from 915 to 1469.
